# Supplementary material
Source: PubMed Central journal article supplement (PMC3581923)
Supplement: 1222729110_pnas.201222729SI.pdf [file 1222729110_pnas.201222729SI.pdf]

# Supporting Information

Reznikov et al. 10.1073/pnas.1222729110

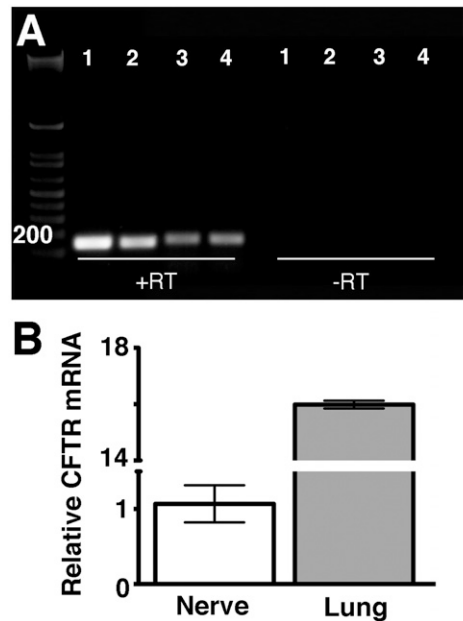

**Fig. S1.** Cystic fibrosis transmembrane conductance regulator (*CFTR*) mRNA is detected in the peripheral and central nervous systems. (A) RT-PCR of trigeminal nerve (lane 1), trigeminal ganglion (lane 2), optic nerve (lane 3), and cerebellum (lane 4). A 155-bp product is the predicted size for *CFTR* mRNA, and bands were sequenced for verification. –RT indicates absence of reverse transcriptase. (B) Quantitative RT-PCR of *CFTR* mRNA from nerves and airway epithelia ( $n = 3$  *CFTR*<sup>+/+</sup> pigs). Values are expressed relative to nerve fraction.

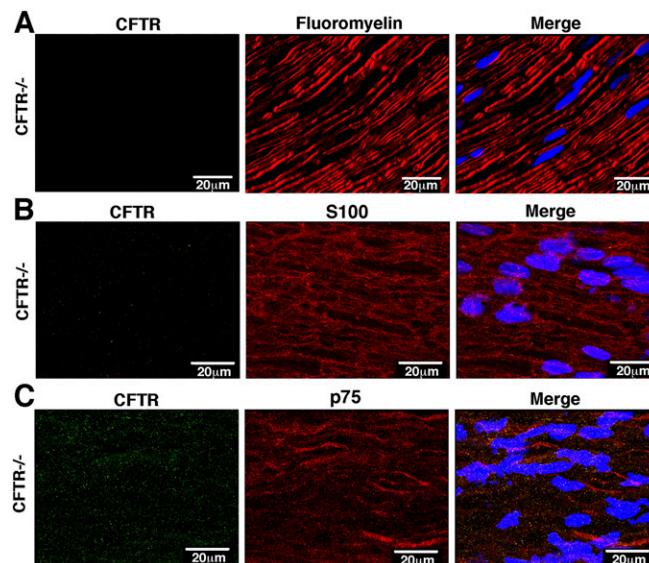

**Fig. S2.** Lack of cystic fibrosis transmembrane conductance regulator (*CFTR*) detection in *CFTR*<sup>-/-</sup> pigs. No *CFTR* staining was observed in transverse and sagittal cross-sections of *CFTR*<sup>-/-</sup> trigeminal nerves, demonstrating specificity of *CFTR* immunohistochemical detection. Staining for fluoromyelin (A), S100 (B), and p75 (C) is shown. Tissues were obtained and treated identically to *CFTR*<sup>+/+</sup> tissues, and images were prepared at the same time as those in Fig. 2. In merged images, nuclei are stained with DAPI (blue). (Scale bar, 20 μm.)

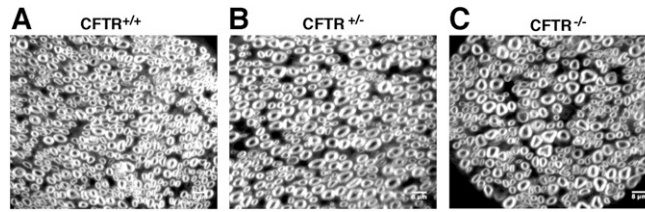

**Fig. S3.** Axon density is reduced in *cystic fibrosis transmembrane conductance regulator* ( $CFTR^{+/-}$ ) and  $CFTR^{-/-}$  trigeminal nerve. Representative confocal images of trigeminal nerve cross-sections demonstrating differences in axon density across genotypes. Cross-sections of an outer fascicle from  $CFTR^{+/+}$  (A),  $CFTR^{+/-}$  (B), and  $CFTR^{-/-}$  (C) newborn pigs are shown. Note the reduction in abundance of axons and the increase in axon size in  $CFTR^{+/-}$  and  $CFTR^{-/-}$  compared with  $CFTR^{+/+}$ .

**Table S1. Conduction velocity, amplitude, and total area of compound action potential**

| Measurement               | $CFTR^{+/+}$   | $CFTR^{+/-}$   | $CFTR^{-/-}$     |
|---------------------------|----------------|----------------|------------------|
| <b>Trigeminal nerve</b>   |                |                |                  |
| Conduction velocity (m/s) | $22.3 \pm 0.7$ | $22.2 \pm 0.9$ | $19.6 \pm 0.6^*$ |
| CAP Amplitude (mV)        | $9.0 \pm 0.5$  | $7.9 \pm 0.3$  | $9.0 \pm 0.6$    |
| Area under curve          | $13.2 \pm 0.8$ | $11.4 \pm 1.2$ | $13.5 \pm 1.0$   |
| <b>Sciatic nerve</b>      |                |                |                  |
| Conduction velocity (m/s) | $32.8 \pm 3.1$ | —              | $25.3 \pm 2.5$   |
| CAP amplitude (mV)        | $5.1 \pm 0.7$  | —              | $5.7 \pm 0.3$    |
| Area under curve          | $5.9 \pm 1.1$  | —              | $6.2 \pm 0.3$    |

Data are mean  $\pm$  SEM. \* $P < 0.05$  compared with  $CFTR^{+/+}$ . *CFTR*, *cystic fibrosis transmembrane conductance regulator*.

**Table S2. Summary of in vivo defects in auditory brainstem response of  $CFTR^{-/-}$  pigs**

| Measurement                       | $CFTR^{+/+}$    | $CFTR^{-/-}$      |
|-----------------------------------|-----------------|-------------------|
| Wave I (ms)                       | $0.53 \pm 0.01$ | $0.55 \pm 0.01^*$ |
| Wave II (ms)                      | $1.10 \pm 0.02$ | $1.19 \pm 0.02^*$ |
| Wave III (ms)                     | $2.79 \pm 0.02$ | $2.76 \pm 0.05$   |
| Wave V (ms)                       | $3.97 \pm 0.08$ | $3.89 \pm 0.07$   |
| Wave I-II interval (ms)           | $0.57 \pm 0.02$ | $0.64 \pm 0.02^*$ |
| Wave I-III interval (ms)          | $2.33 \pm 0.06$ | $2.20 \pm 0.05$   |
| Wave III-V interval (ms)          | $1.12 \pm 0.07$ | $1.13 \pm 0.04$   |
| Wave I-V interval (ms)            | $3.45 \pm 0.07$ | $3.34 \pm 0.07$   |
| Peak-to-peak amplitude ( $\mu$ V) | $1.07 \pm 0.09$ | $1.21 \pm 0.15$   |

Data are mean  $\pm$  SEM. \* $P < 0.05$  compared with  $CFTR^{+/+}$ .
